# Supplementary material for: Chemical and Biological Assessment ofAngelicaRoots from Different Cultivated Regions in a Chinese Herbal Decoction Danggui Buxue Tang
Source: Hindawi journal article supplement (doi:10.1155/2013/483286), 2013-01-01
Supplement: f1 [file 483286.f1.pdf]

**Supplementary Table 1. Mass spectra properties of marker chemicals.**

| Chemical              | Formula                                        | Calculated mass [M] | Precursor ion <sup>a</sup> | Collision energy <sup>b</sup> | Production ion <sup>c</sup> | Retention time <sup>d</sup> |
|-----------------------|------------------------------------------------|---------------------|----------------------------|-------------------------------|-----------------------------|-----------------------------|
| Ferulic acid          | C <sub>10</sub> H <sub>10</sub> O <sub>4</sub> | 194.10              | 149.6                      | 10                            | 135                         | 11.251                      |
|                       |                                                |                     |                            | 20                            | 107                         |                             |
| Paeonol               | C <sub>9</sub> H <sub>10</sub> O <sub>3</sub>  | 166.17              | 150.6                      | 10                            | 95                          | 12.757                      |
|                       |                                                |                     |                            | 40                            | 52                          |                             |
| Butylphthalide        | C <sub>12</sub> H <sub>14</sub> O <sub>2</sub> | 190.23              | 132.6                      | 20                            | 77                          | 15.527                      |
|                       |                                                |                     |                            | 40                            | 51                          |                             |
| Z-Butylidenephthalide | C <sub>12</sub> H <sub>12</sub> O <sub>2</sub> | 188.22              | 158.6                      | 10                            | 131                         | 15.852                      |
|                       |                                                |                     |                            | 20                            | 103                         |                             |
| Senkyunolide A        | C <sub>12</sub> H <sub>16</sub> O <sub>2</sub> | 192.25              | 106.7                      | 10                            | 79                          | 16.580                      |
|                       |                                                |                     |                            | 10                            | 77                          |                             |
| Z-Ligustilide         | C <sub>12</sub> H <sub>14</sub> O <sub>2</sub> | 190.10              | 147.7                      | 20                            | 105                         | 16.823                      |
|                       |                                                |                     |                            | 40                            | 77                          |                             |

<sup>a</sup> The ion of relative highest intensity was used as the precursor ion for the quantification.

<sup>b</sup> The collision energy was optimized to have the greatest product ion intensity, which was the key factor in the MRM mode.

<sup>c</sup> Two product ions were used for the MRM analysis. The upper one was used for quantitative analysis and the lower one was for qualitative analysis, which could guarantee the precision of analytes.

<sup>d</sup> The retention time was determined by 3 different individual analyses ( $n = 3$ ).

**Supplementary Table 2. Calibration curves, LOD and LOQ of five markers.**

| <b>Chemical</b>              | <b>Calibration curve<sup>a</sup></b> | <b>Correlation coefficient (<math>r^2</math>)</b> | <b>Linear range</b> | <b>LOD<sup>b</sup> (ng/ml)</b> | <b>LOQ<sup>c</sup> (ng/ml)</b> |
|------------------------------|--------------------------------------|---------------------------------------------------|---------------------|--------------------------------|--------------------------------|
| <b>Z-Ligustilide</b>         | $y=0.7169x-0.0497$                   | 0.9945                                            | 0.1-50              | 7.08                           | 33.3                           |
| <b>Ferulic acid</b>          | $y=0.7984x-0.2864$                   | 0.9903                                            | 0.1-50              | 2.77                           | 12.5                           |
| <b>Butylphthalide</b>        | $y=14.0273x-0.1603$                  | 0.9970                                            | 0.02-5              | 0.32                           | 1.3                            |
| <b>Z-Butylidenephthalide</b> | $y=4.4408x-0.0611$                   | 0.9955                                            | 0.02-5              | 0.47                           | 2                              |
| <b>Senkyunolide A</b>        | $y=2.3792x-0.0417$                   | 0.9922                                            | 0.02-5              | 2.71                           | 13                             |

<sup>a</sup>The calibration curves were constructed by plotting the peak areas versus the concentration of each analyte. Each calibration curve included six data points.

<sup>b</sup>LOD refers to the limits of detection.

<sup>c</sup>LOQ refers to the limits of quantification.

**Supplementary Table 3. Precision, repeatability and recovery of markers.**

| Chemical                     | Precision                       |            |                                 |            | Repeatability<br>(n=5) |            | Recovery <sup>a</sup><br>(n=5) |            |
|------------------------------|---------------------------------|------------|---------------------------------|------------|------------------------|------------|--------------------------------|------------|
|                              | Intra-day <sup>b</sup><br>(n=6) |            | Inter-day <sup>c</sup><br>(n=6) |            | Mean<br>(ng/mL)        | RSD<br>(%) | Mean<br>(%)                    | RSD<br>(%) |
|                              | Mean<br>(ng/mL)                 | RSD<br>(%) | Mean<br>(ng/mL)                 | RSD<br>(%) |                        |            |                                |            |
| <b>Z-Ligustilide</b>         | 0.98                            | 1.98       | 0.91                            | 3.29       | 17.67                  | 2.98       | 96.91                          | 3.31       |
| <b>Ferulic acid</b>          | 1.04                            | 0.26       | 1.44                            | 1.58       | 1.41                   | 1.19       | 97.57                          | 1.85       |
| <b>Butylphthalide</b>        | 1.01                            | 1.48       | 0.93                            | 1.39       | 0.91                   | 1.73       | 99.90                          | 1.66       |
| <b>Z-Butylidenephthalide</b> | 1.07                            | 2.76       | 1.02                            | 2.36       | 0.10                   | 2.03       | 100.30                         | 2.10       |
| <b>Senkyunolide A</b>        | 0.96                            | 3.01       | 1.04                            | 4.05       | 0.89                   | 2.61       | 98.75                          | 2.21       |

<sup>a</sup> Recovery (%) =  $100 \times (\text{amount found} - \text{original amount}) / \text{amount spiked}$ . The data were presented as average of three independent determinations, and the SD was <5% of the mean, which was not shown for clarity.

<sup>b</sup> The intra-day analysis refers to the sample examined for six replicates within one day.

<sup>c</sup> The inter-day analysis refers to the sample examined in duplicates over three consecutive days.
